# Supplementary material for: Mediating Factors in the Association of Maternal Educational Level With Pregnancy Outcomes: A Mendelian Randomization Study
Source: PubMed Central journal article supplement (PMC10784860; doi:10.1001/jamanetworkopen.2023.51166), 2024-01-11
Supplement: jamanetwopen-e2351166-s002.pdf [file jamanetwopen-e2351166-s002.pdf]

## Data Sharing Statement

Rogne. Mediating Factors in the Association of Maternal Educational Level With Pregnancy Outcomes. *JAMA Netw Open*. Published January 11, 2024.

doi:10.1001/jamanetworkopen.2023.51166

### Data

**Data available:** No

### Additional Information

**Explanation for why data not available:** Data already publicly available
